# Supplementary material
Source: PubMed Central journal article supplement (PMC3331894)
Supplement: NIHMS361302-supplement-4.pdf [file NIHMS361302-supplement-4.pdf]

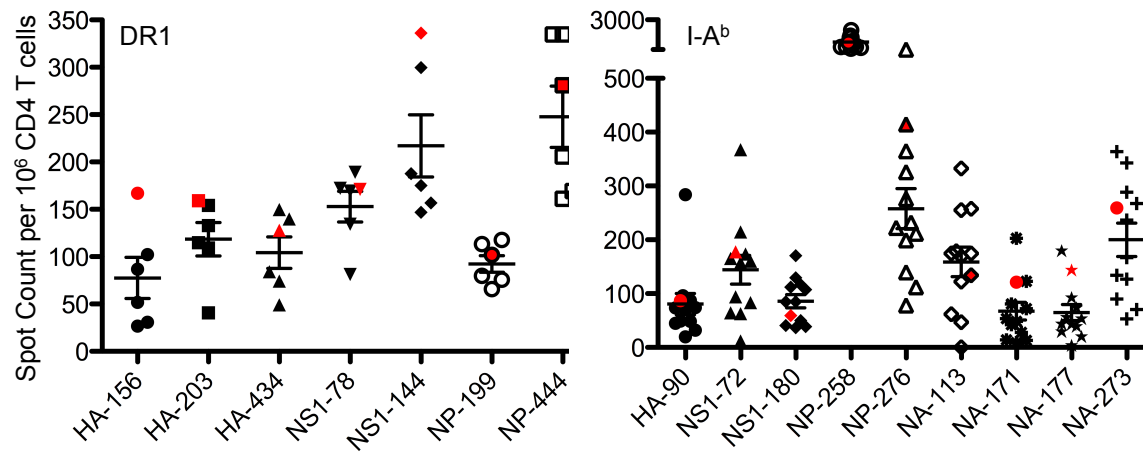

Supplemental Figure 3. Influenza specific T cell responses in individual mice. B10 (left) or HLA-DR1 Tg (right) mice were infected with influenza A/New Caledonia/20/99 and 10-14 days post infection CD4 T cells were isolated from individual animals and tested for reactivity with the indicated peptides by cytokine EliSpots (IFN-g for B10 or IL-2 for DR1). Responses are presented as spots per million CD4 T cells. Shown by the red symbol is the average spot count from pooled samples from at least 3 different experiments.
